# Supplementary material for: Predictive and prognostic impact of ferroptosis-related genes ACSL4 and GPX4 on breast cancer treated with neoadjuvant chemotherapy
Source: PubMed Central journal article supplement — eBioMedicine. 2021 Sep 2;71:103560. doi: 10.1016/j.ebiom.2021.103560 (PMC8417304; doi:10.1016/j.ebiom.2021.103560), 2021-09-02
Supplement: mmc2.pdf [file mmc2.pdf]

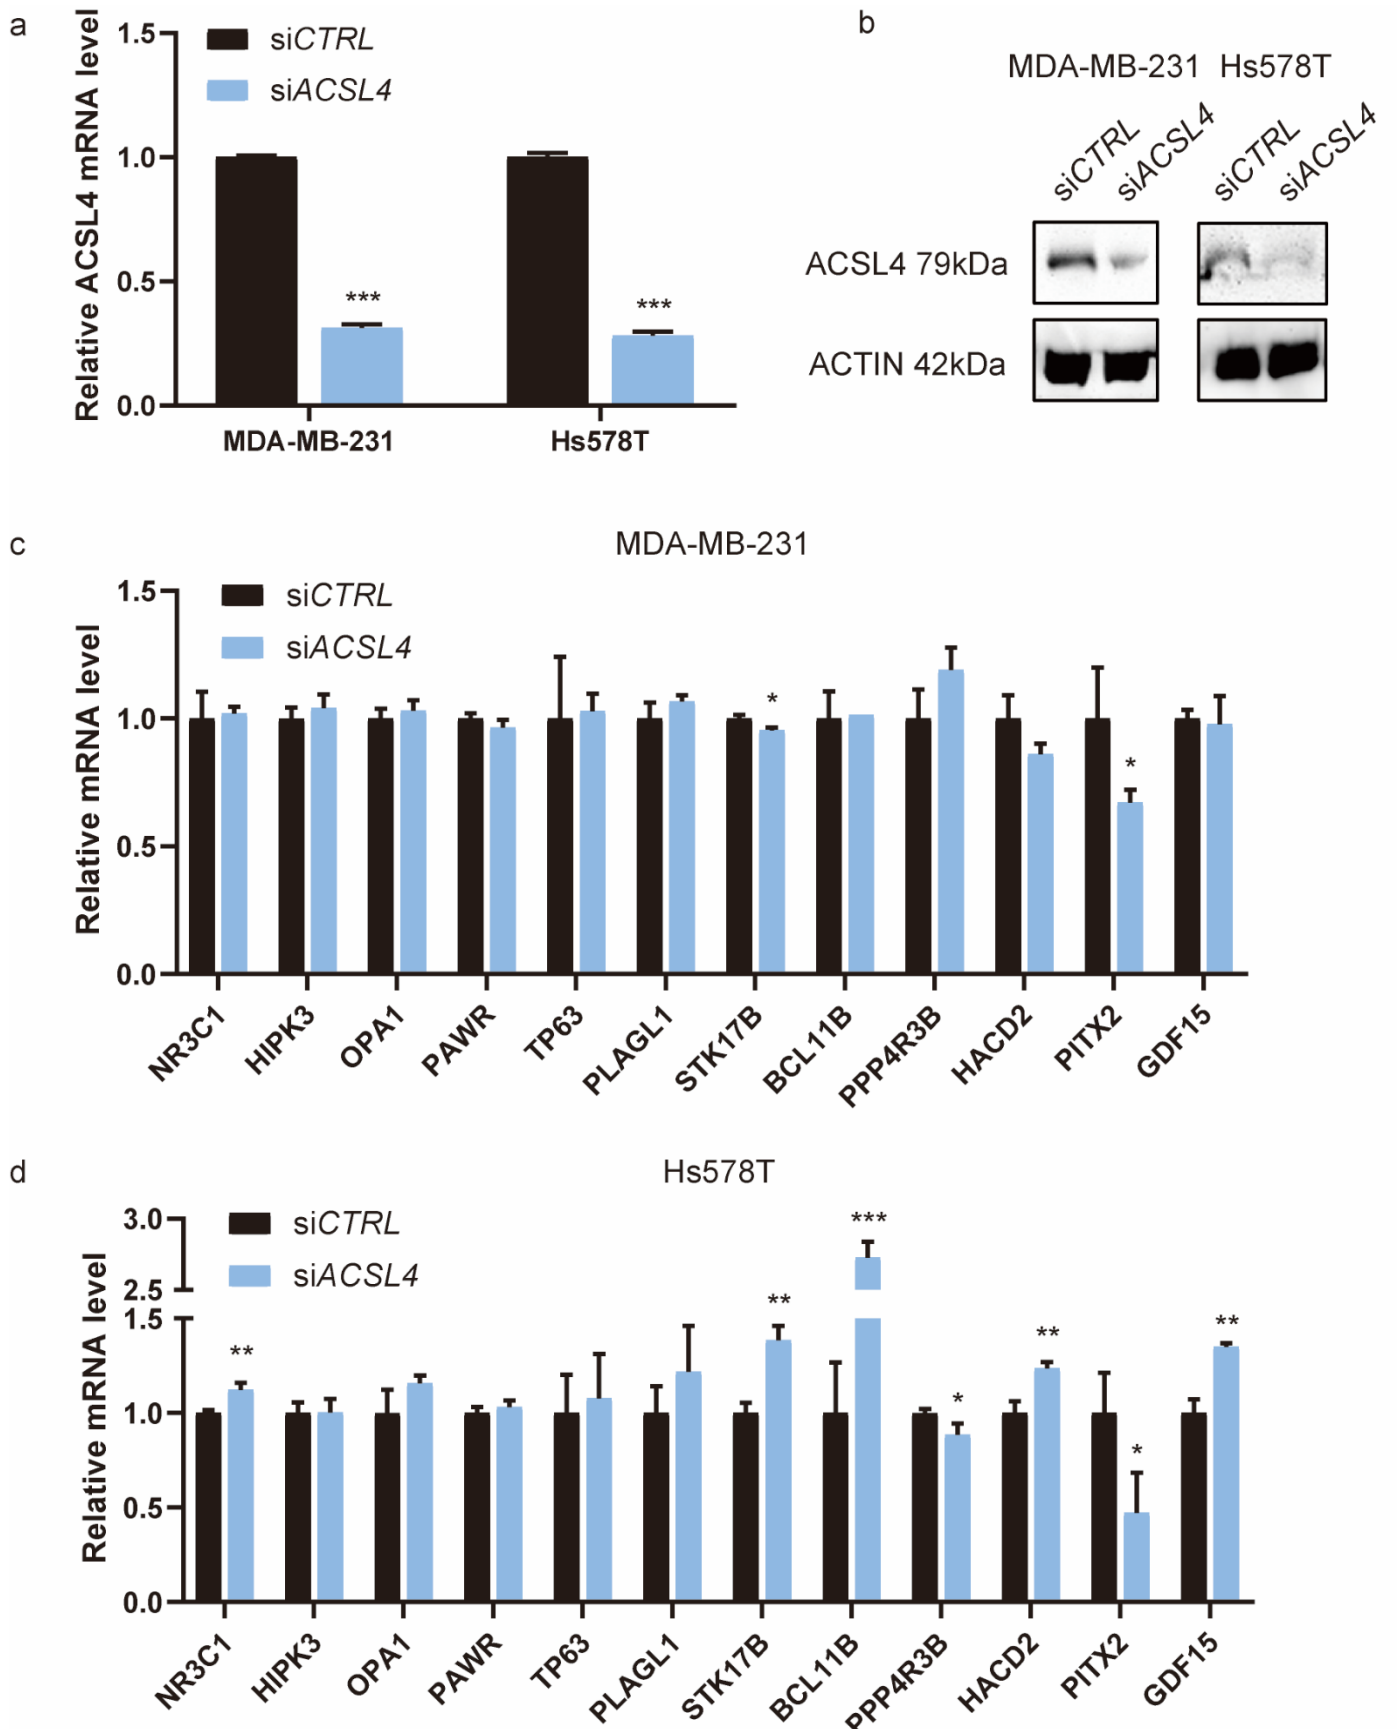

**Figure S2. Verification of the differentially expressed genes of ACSL4 in MDA-MB-231 and Hs578T cell lines.**

**Notes:** (a) Interfering efficiency in MDA-MB-231 and Hs578T cell lines detected by RT-qPCR. (b) Interfering efficiency in MDA-MB-231 and Hs578T cell lines detected by western blot. (c) Differentially expressed genes validated by RT-qPCR after transfecting ACSL4 siRNAs into MDA-MB-231 cell line. (d) Differentially expressed genes validated by RT-qPCR after transfecting ACSL4 siRNAs into Hs578T cell line. \*  $P < 0.05$ , \*\*  $P < 0.01$ , and \*\*\*  $P < 0.001$  (Student's t test).

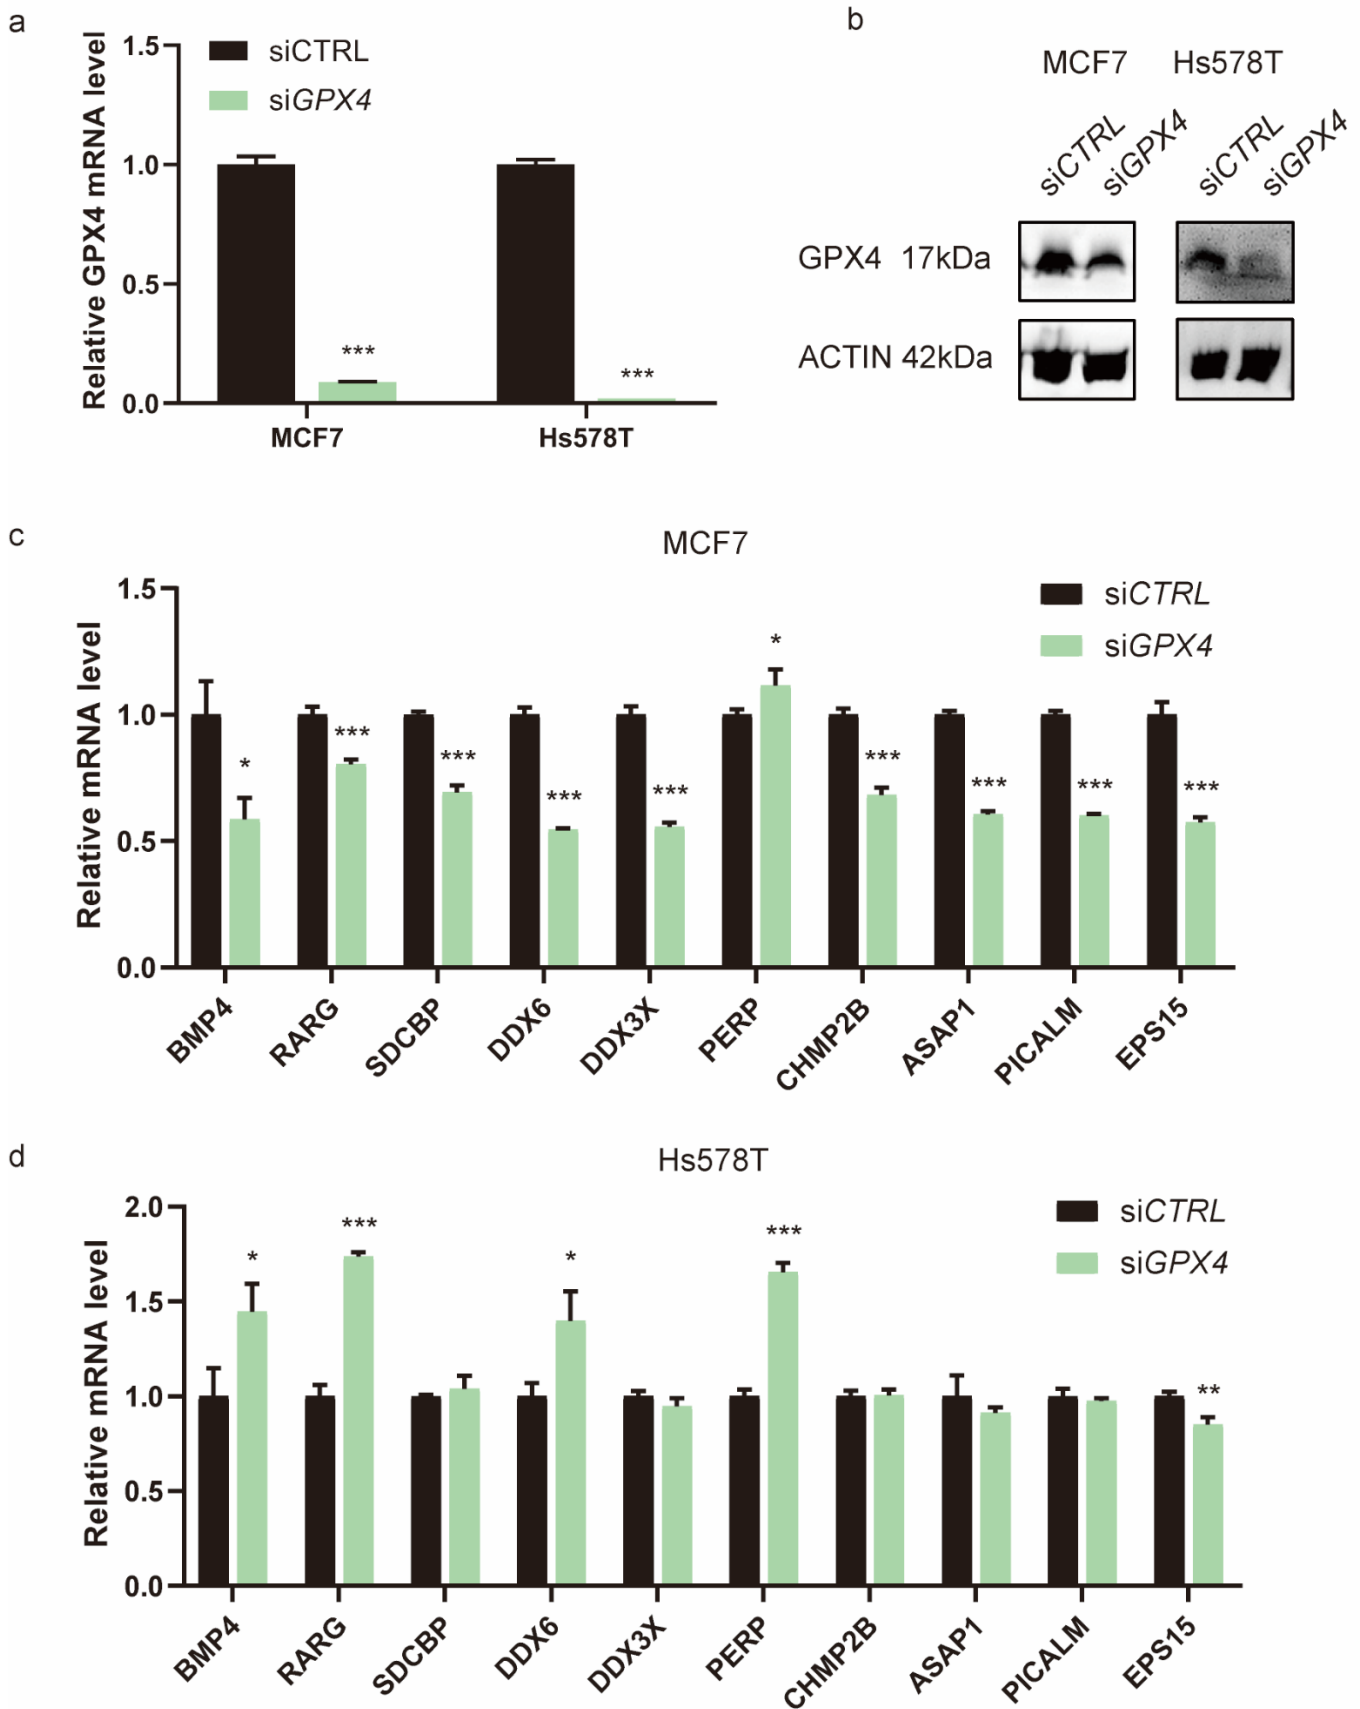

**Figure S3. Verification of the differentially expressed genes of GPX4 in MCF7 and Hs578T cell lines.**

**Notes:** (a) Interfering efficiency in MCF7 and Hs578T cell lines detected by RT-qPCR. (b) Interfering efficiency in MCF7 and Hs578T cell lines detected by western blot. (c) Differentially expressed genes validated by RT-qPCR after transfecting GPX4 siRNAs into MCF7 cell line. (d) Differentially expressed genes validated by RT-qPCR after transfecting GPX4 siRNAs into Hs578T cell line. \*  $P < 0.05$ , \*\*  $P < 0.01$ , and \*\*\*  $P < 0.001$  (Student's t test).
