# Supplementary material for: Predictive and prognostic impact of ferroptosis-related genes ACSL4 and GPX4 on breast cancer treated with neoadjuvant chemotherapy
Source: PubMed Central journal article supplement — eBioMedicine. 2021 Sep 2;71:103560. doi: 10.1016/j.ebiom.2021.103560 (PMC8417304; doi:10.1016/j.ebiom.2021.103560), 2021-09-02

| Sample File                           | Sample Name | Panel               | OS                                   | SQ                                    |
|---------------------------------------|-------------|---------------------|--------------------------------------|---------------------------------------|
| 07_G01_CellLineAuthenticaion-0213.fsa | 231         | STR Profile 1-human | <span style="color: green;">■</span> | <span style="color: yellow;">▲</span> |

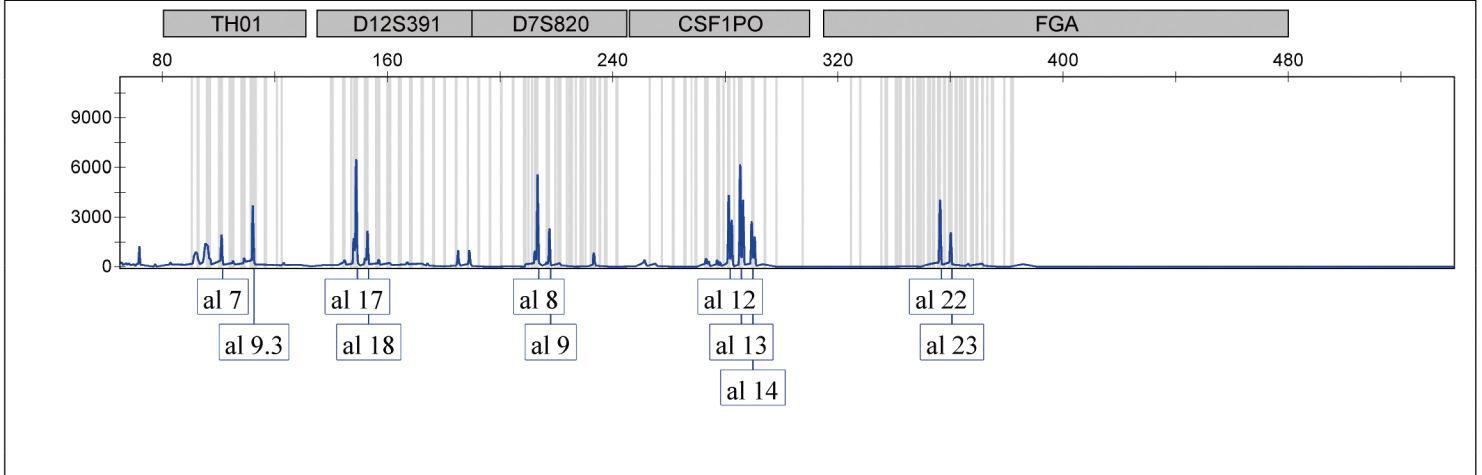

| Sample File                                 | Sample Name | Panel               | OS                                    | SQ                                    |
|---------------------------------------------|-------------|---------------------|---------------------------------------|---------------------------------------|
| 50_B07_XBJD17YB(170)8-11XY(2c)7-11-0215.fsa | 231         | STR Profile 2-human | <span style="color: yellow;">▲</span> | <span style="color: yellow;">▲</span> |

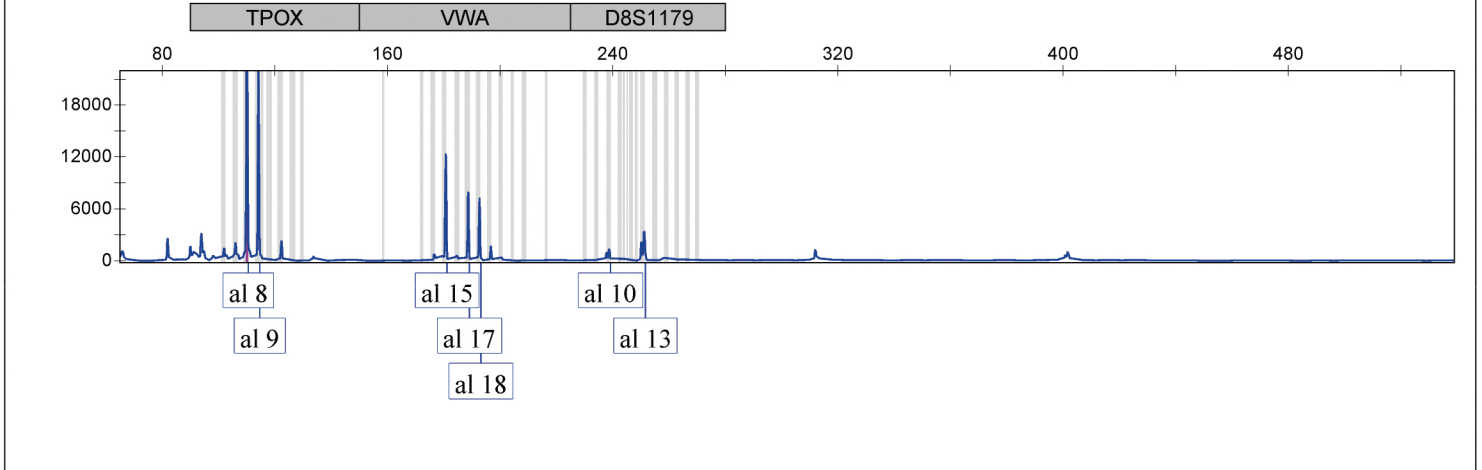

| Sample File                           | Sample Name | Panel               | OS                                   | SQ                                    |
|---------------------------------------|-------------|---------------------|--------------------------------------|---------------------------------------|
| 23_G03_CellLineAuthenticaion-0213.fsa | 231         | STR Profile 3-human | <span style="color: green;">■</span> | <span style="color: yellow;">▲</span> |

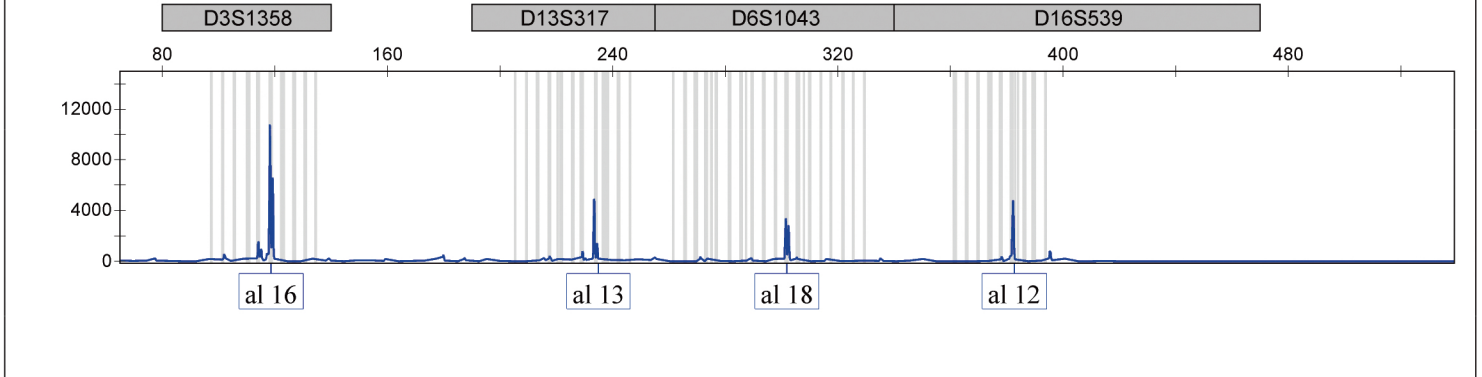

| Sample File                                 | Sample Name | Panel               | OS                                   | SQ                                    |
|---------------------------------------------|-------------|---------------------|--------------------------------------|---------------------------------------|
| 54 F07_XBJD17YB(170)8-11XY(2c)7-11-0215.fsa | 231         | STR Profile 4-human | <span style="color: green;">■</span> | <span style="color: yellow;">▲</span> |

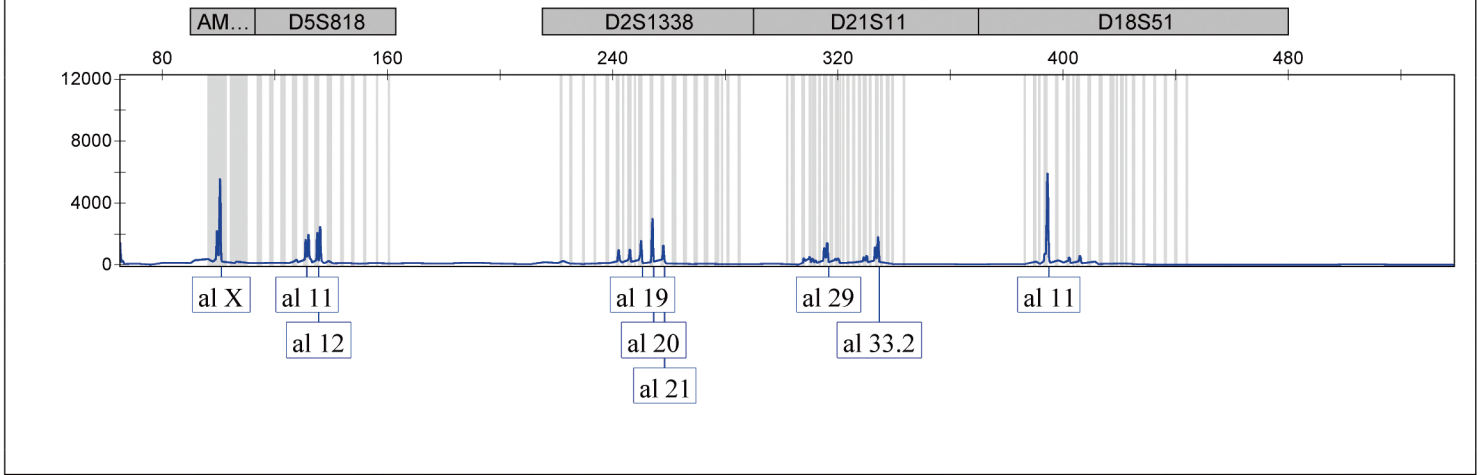

Supplement: mmc4.pdf [file mmc4.pdf]
