# Supplementary material for: Predictive and prognostic impact of ferroptosis-related genes ACSL4 and GPX4 on breast cancer treated with neoadjuvant chemotherapy
Source: PubMed Central journal article supplement — eBioMedicine. 2021 Sep 2;71:103560. doi: 10.1016/j.ebiom.2021.103560 (PMC8417304; doi:10.1016/j.ebiom.2021.103560), 2021-09-02

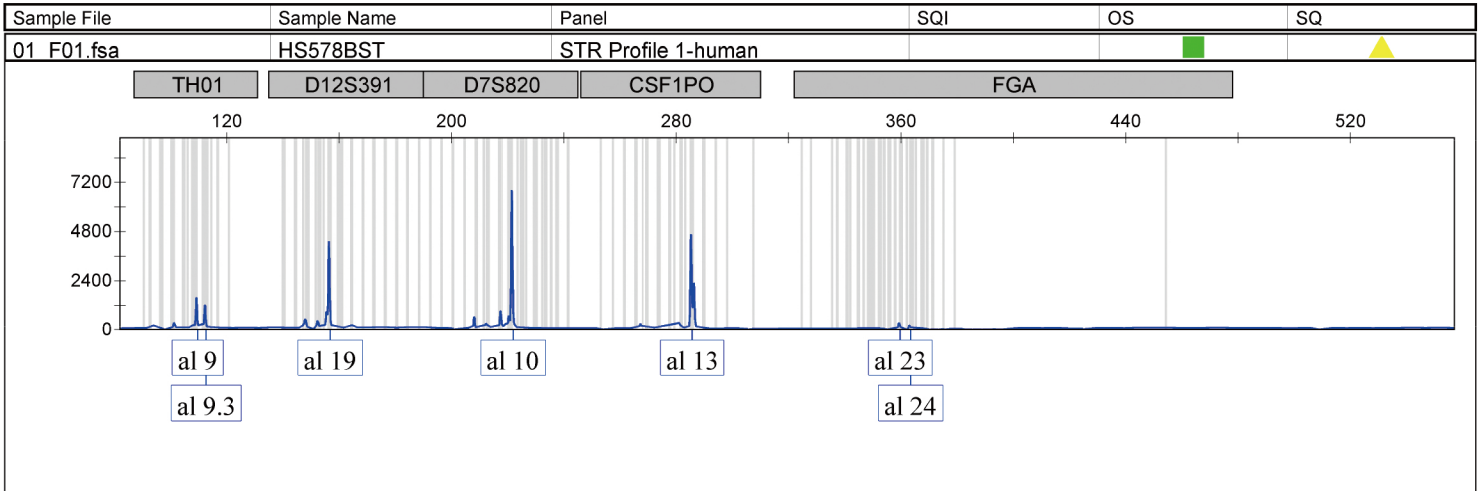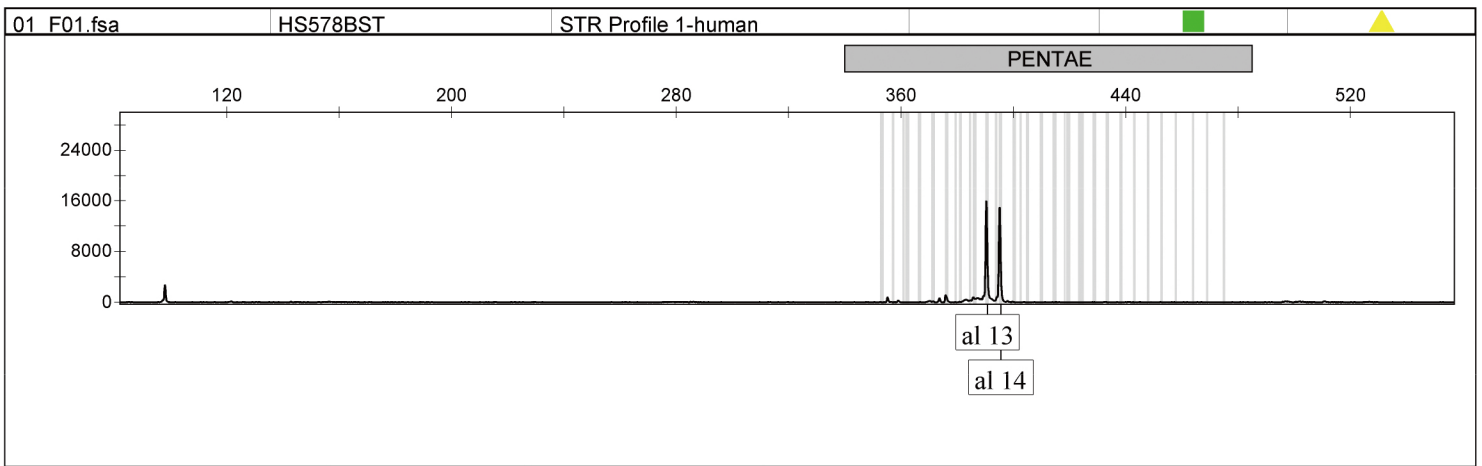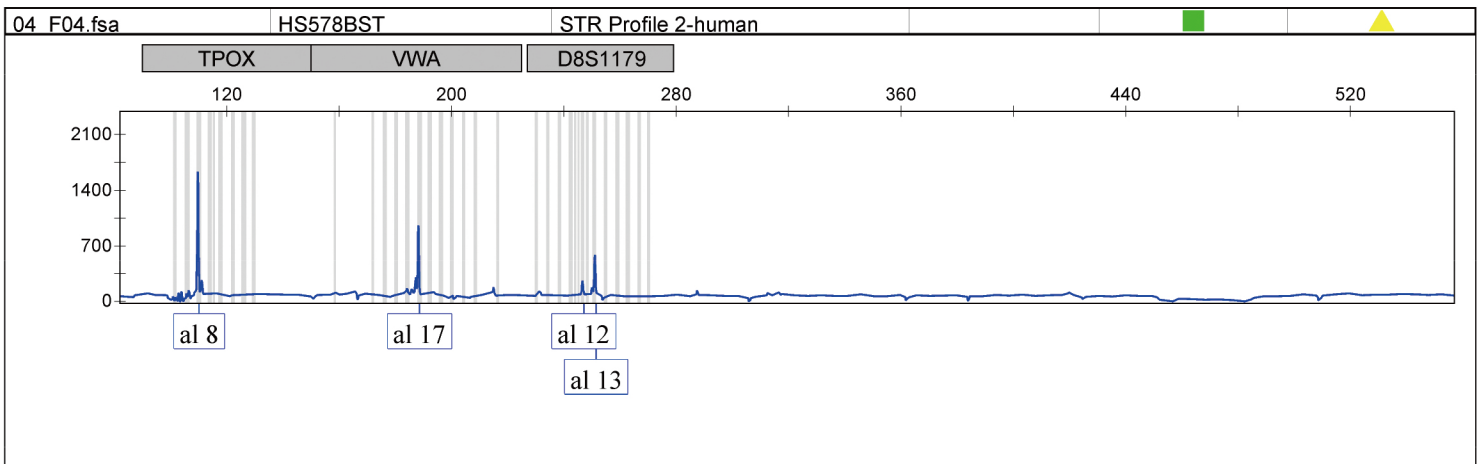

| Sample File | Sample Name | Panel               | SQ1 | OS | SQ |
|-------------|-------------|---------------------|-----|----|----|
| 04_F04.fsa  | HS578BST    | STR Profile 2-human |     | ■  | ▲  |

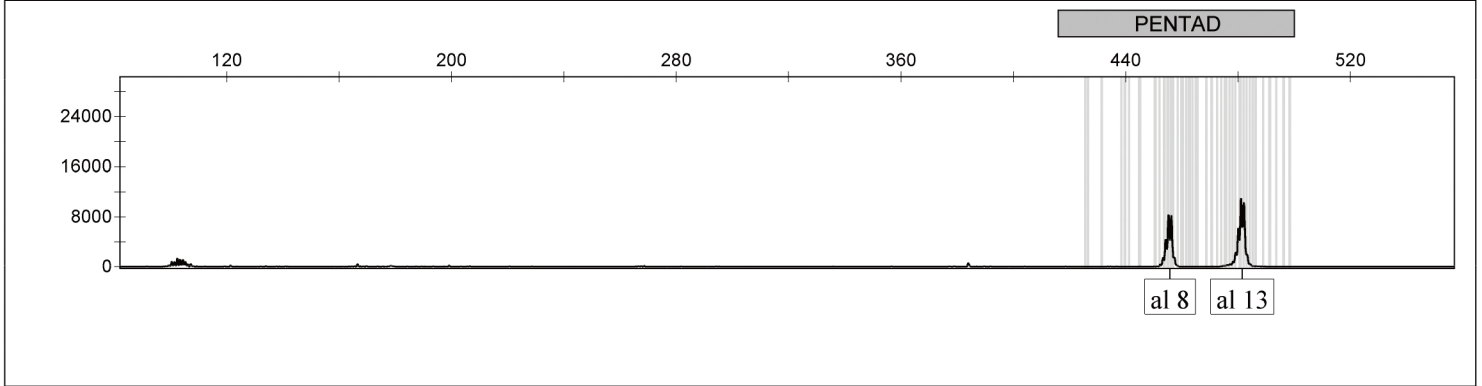

| Sample File | Sample Name | Panel               | SQ1 | OS | SQ |
|-------------|-------------|---------------------|-----|----|----|
| 07_F07.fsa  | HS578BST    | STR Profile 3-human |     | ■  | ▲  |

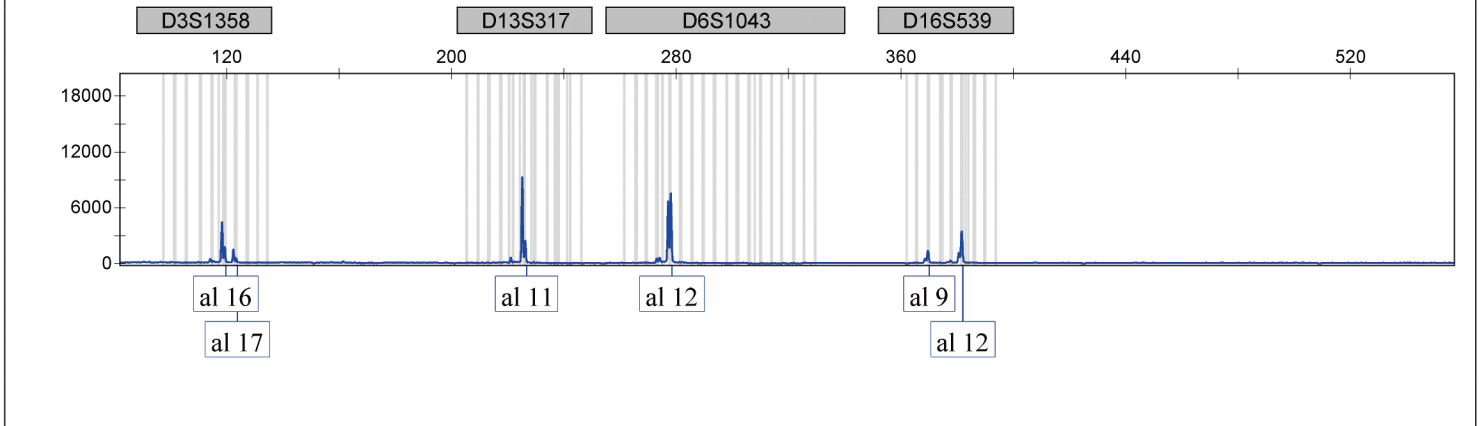

| Sample File | Sample Name | Panel               | SQ1 | OS | SQ |
|-------------|-------------|---------------------|-----|----|----|
| 07_F07.fsa  | HS578BST    | STR Profile 3-human |     | ■  | ▲  |

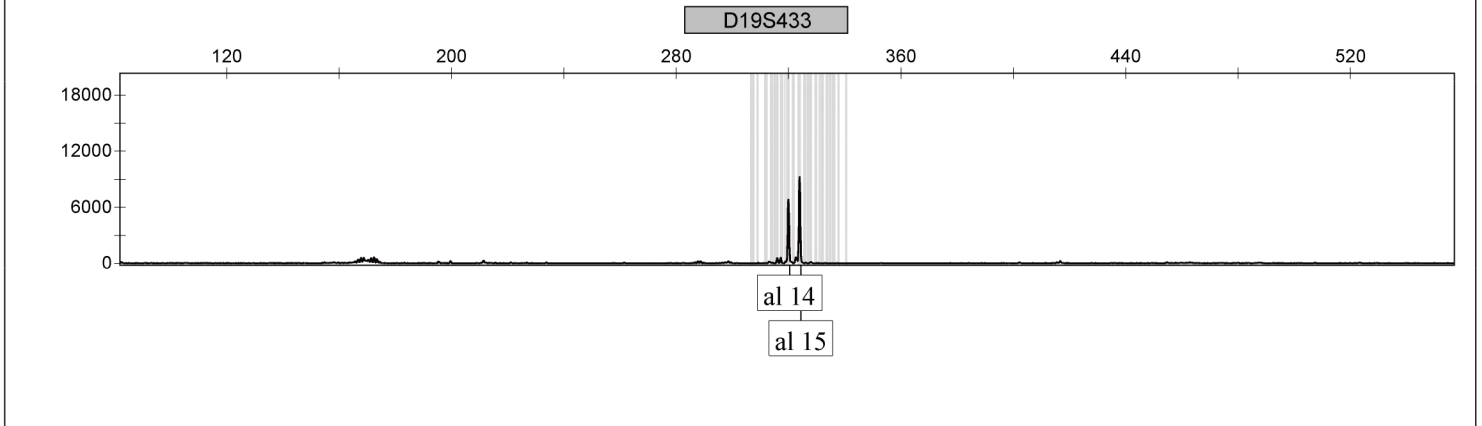

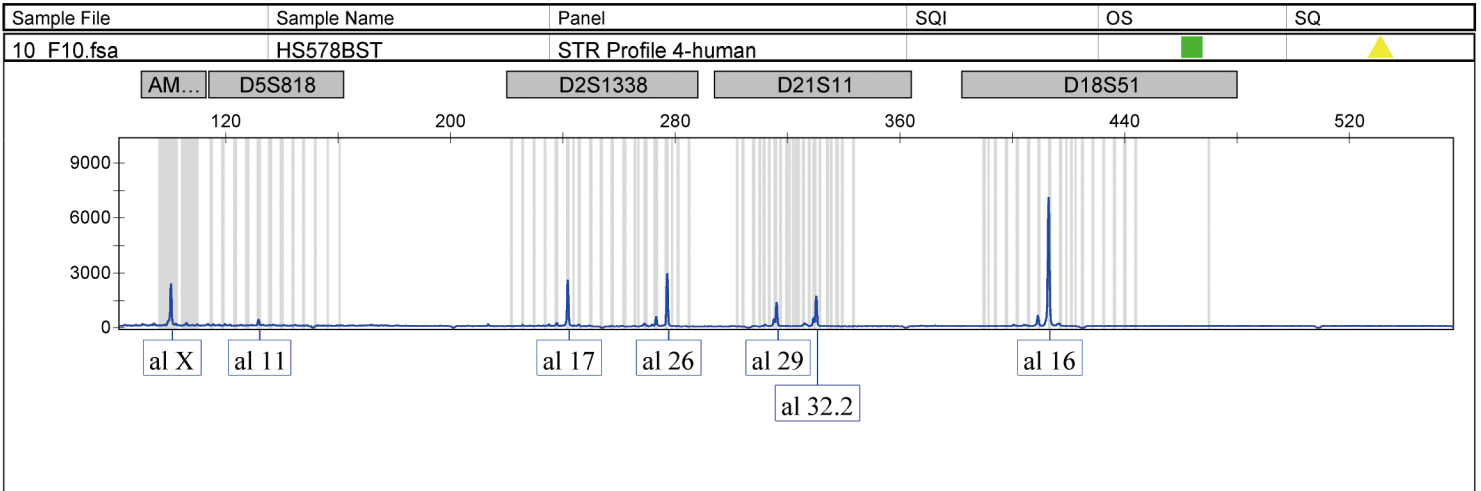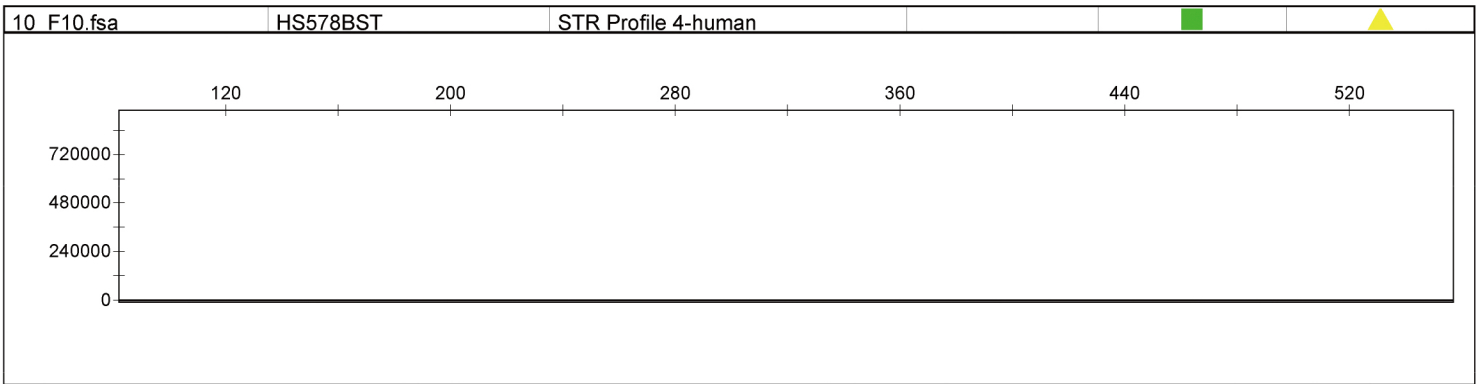

Supplement: mmc5.pdf [file mmc5.pdf]
