# Supplementary figures and images for: Predictive and prognostic impact of ferroptosis-related genes ACSL4 and GPX4 on breast cancer treated with neoadjuvant chemotherapy
Source: PubMed Central journal article supplement — eBioMedicine. 2021 Sep 2;71:103560. doi: 10.1016/j.ebiom.2021.103560 (PMC8417304; doi:10.1016/j.ebiom.2021.103560), 2021-09-02

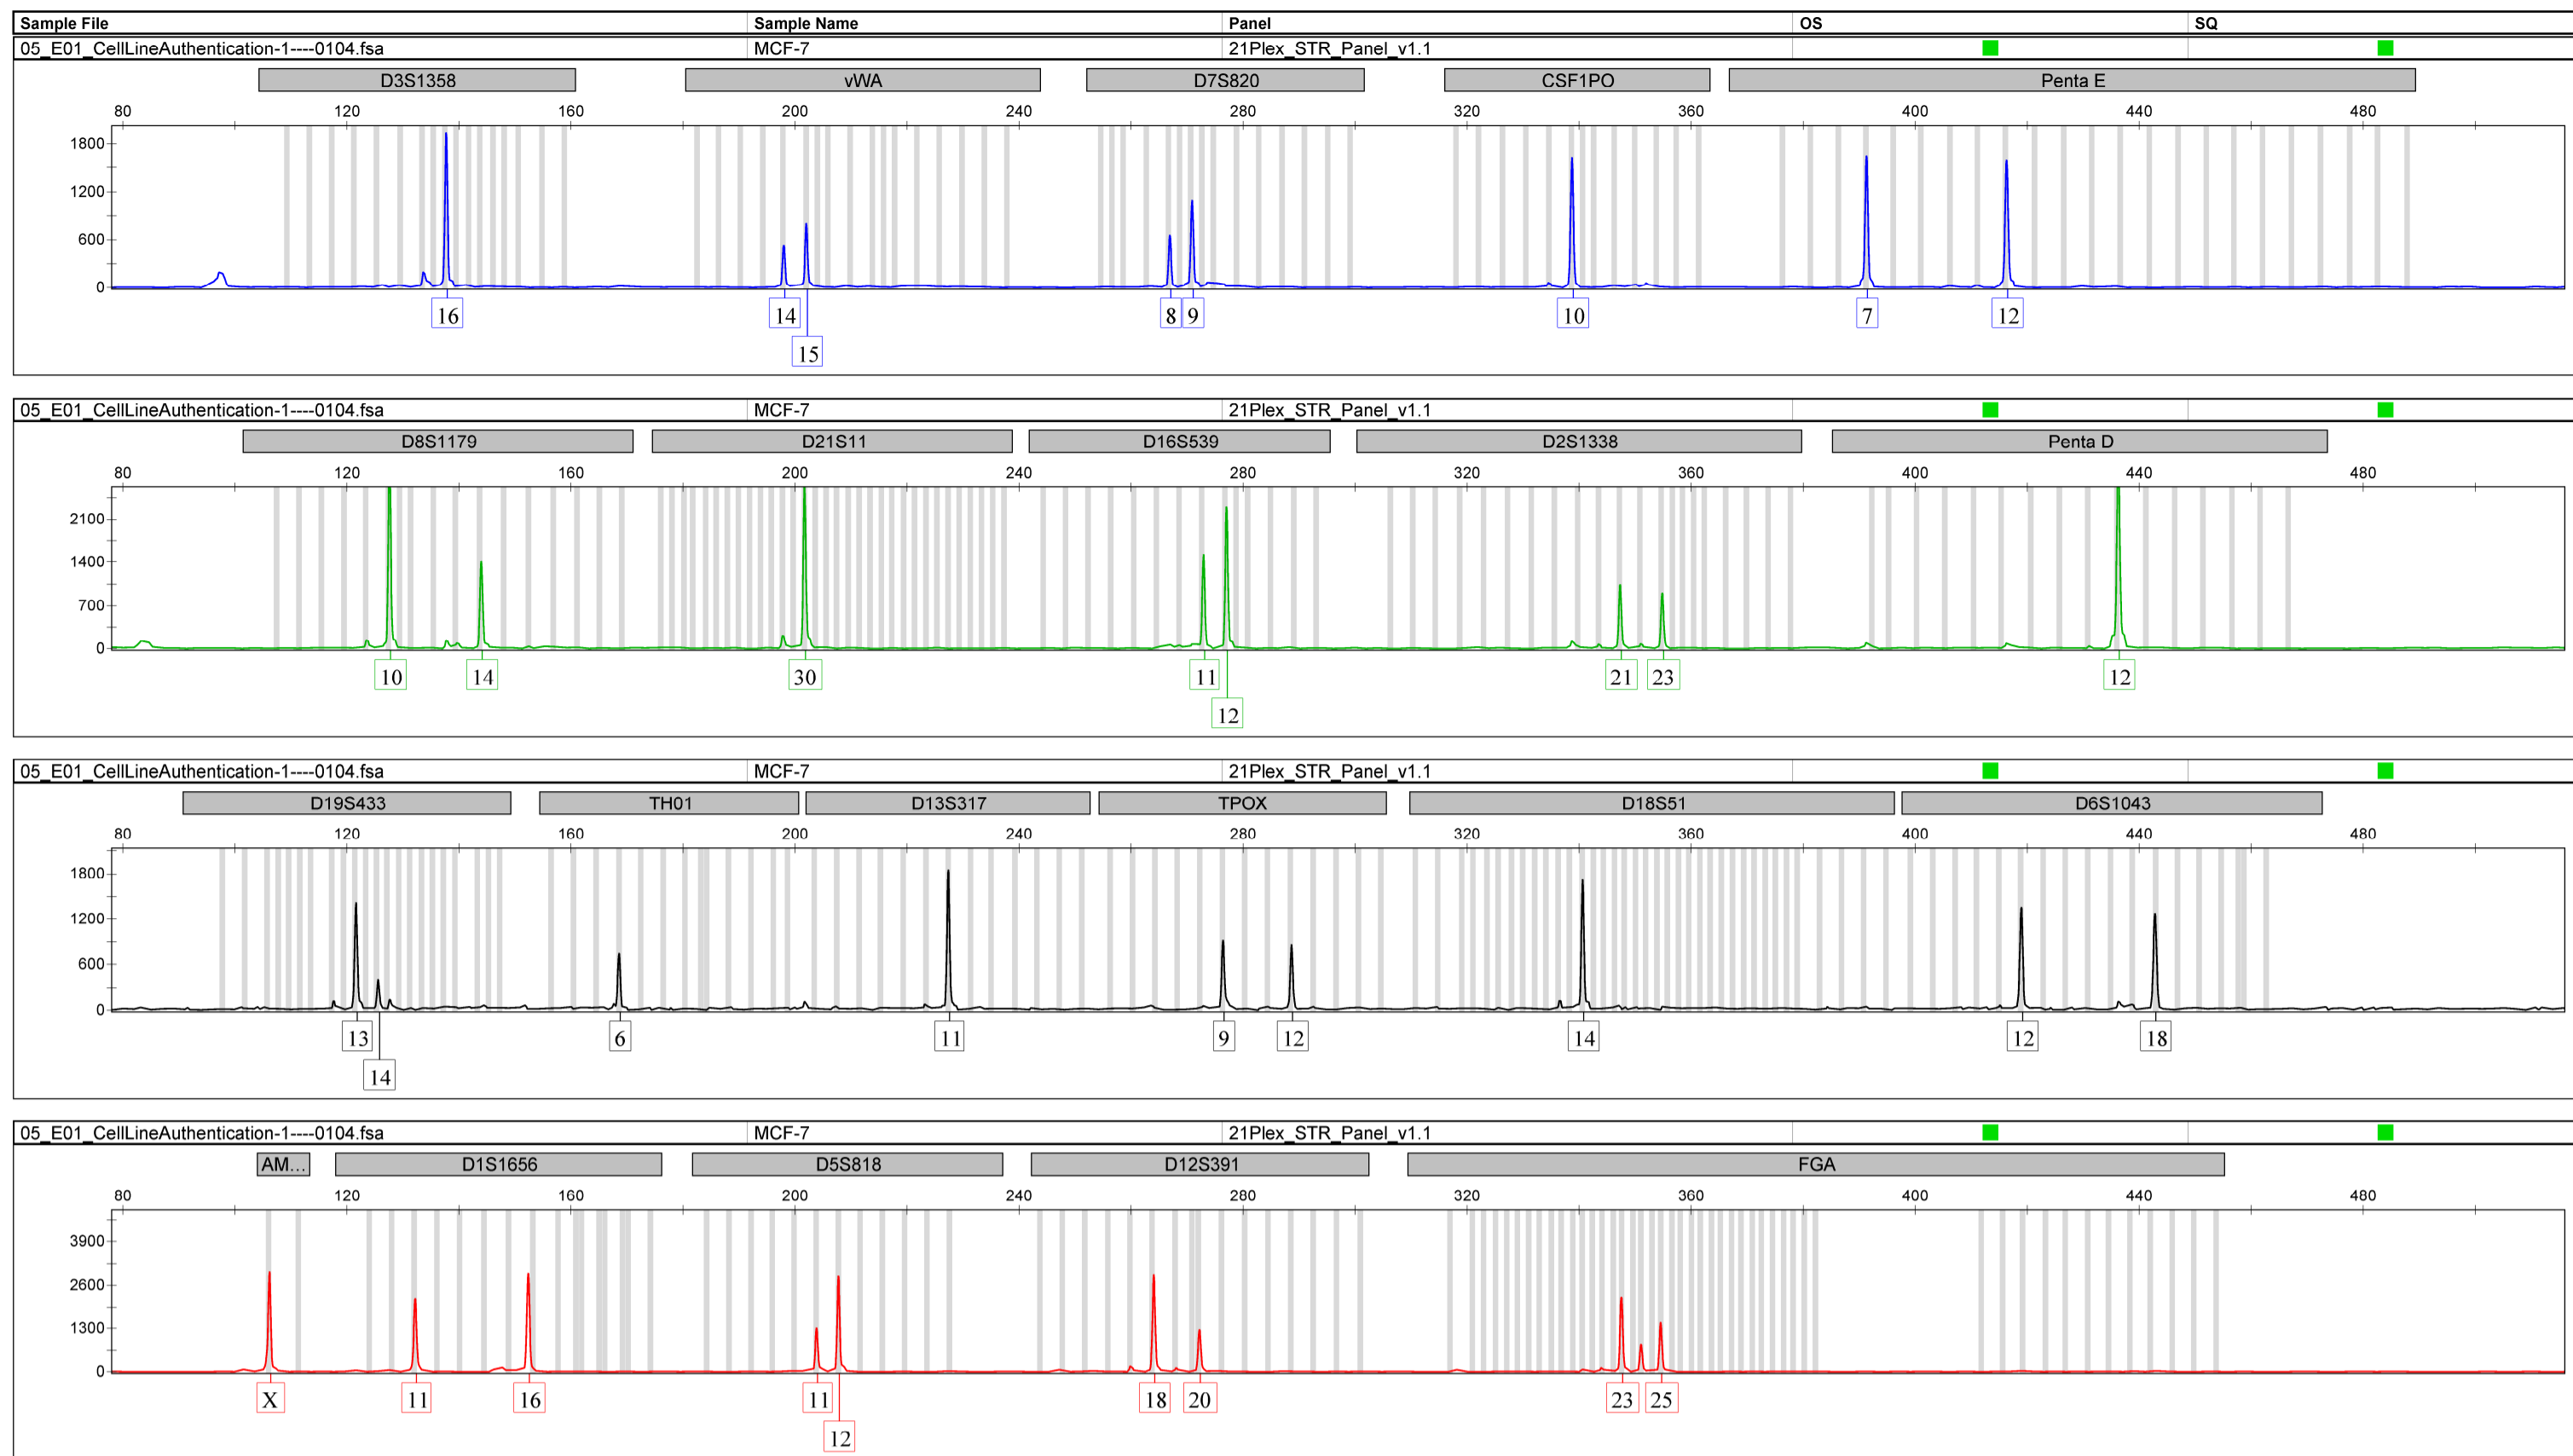

Supplement: mmc3.pdf [file mmc3.pdf]
